# Supplementary material
Source: PubMed Central journal article supplement (PMC4396607)
Supplement: supp_fj.14-260570_Supplemental_Figure1.pdf [file supp_fj.14-260570_Supplemental_Figure1.pdf]

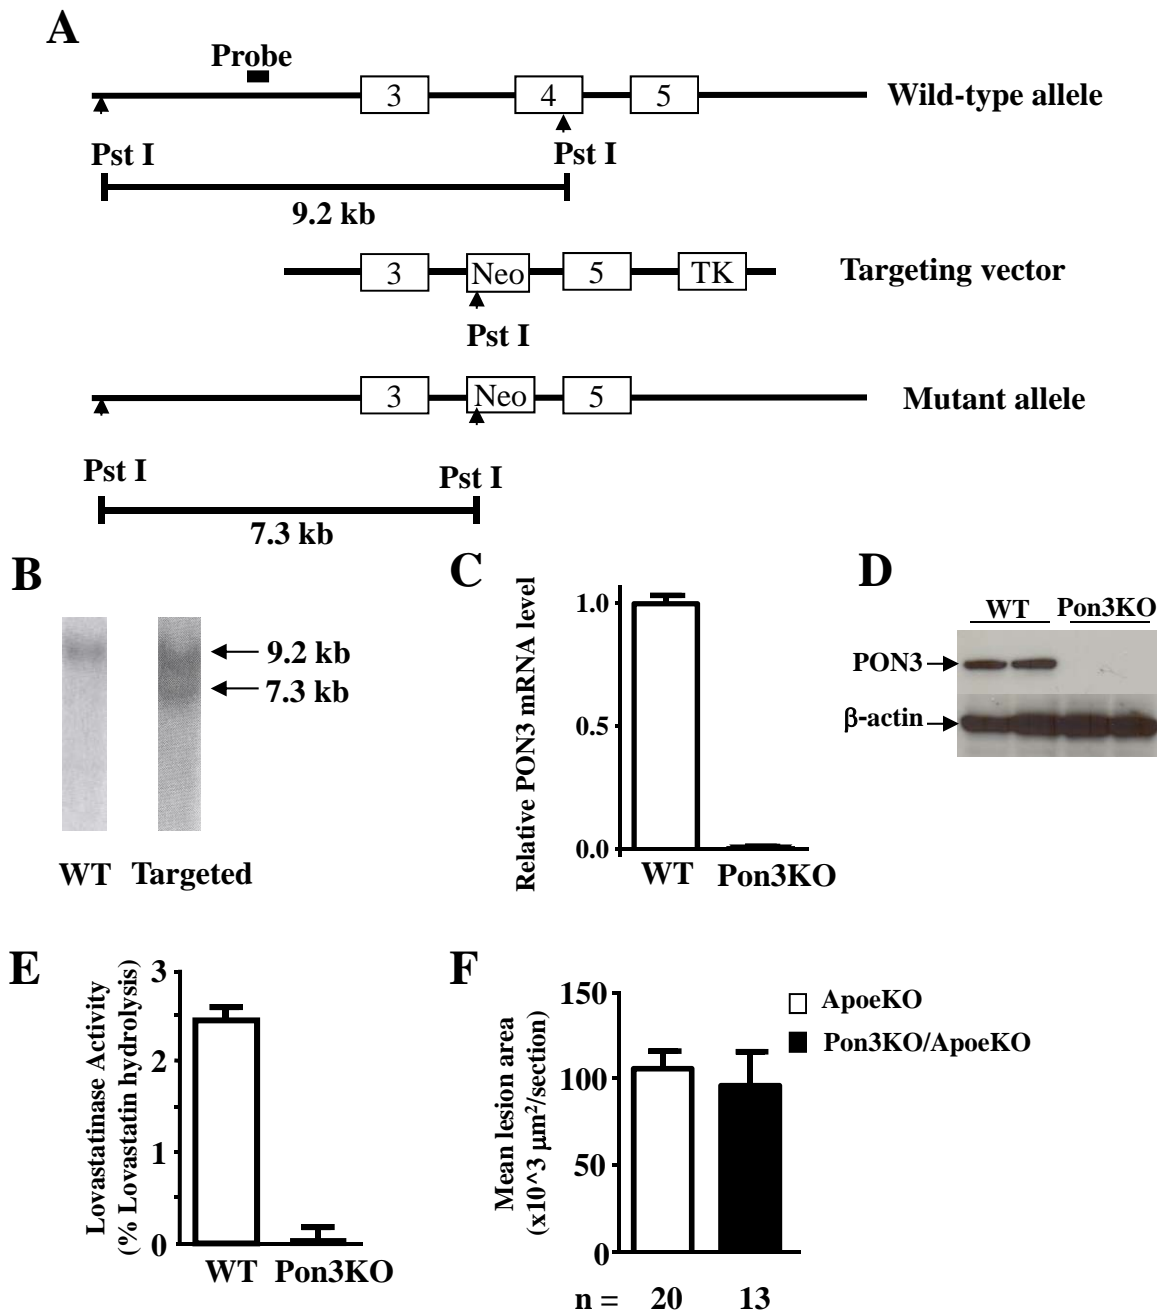

**Supplemental Figure S1. Construction of Pon3KO mice.** (A) Targeted deletion of *Pon3* scheme showing a partial digestion map (Pst I) of the *Pon3* wild-type (WT) allele, targeting vector, and mutant allele. Homologous recombination of targeting vector and wild-type allele results in the replacement of exon 4 with the positive selection marker, a neomycin cassette (Neo). Thymidine kinase (TK) is the negative selection marker. External probe reveals a 9.2 kb Pst I fragment for the wild-type allele and a 7.3 kb Pst I fragment for the mutant allele. (B) Southern blot analysis of DNA isolated from targeted ES cells. (C) qPCR analysis of *Pon3* mRNA in the livers of WT and Pon3KO mice. (D) Immunoblotting of PON3 using liver lysates of WT and Pon3KO mice. Immunoblotting of  $\beta$ -actin was used as a loading control. (E) Lovastatinase activity was absent in the liver homogenates of Pon3KO mice. (F) Atherosclerotic lesion size at the aortic root region of five-month-old ApoeKO and Pon3KO/ApoeKO mice maintained on a 6% fat chow diet was shown.
