# Supplementary material
Source: PubMed Central journal article supplement (PMC4396607)
Supplement: supp_fj.14-260570_Supplemental_Figures.pdf [file supp_fj.14-260570_Supplemental_Figures.pdf]

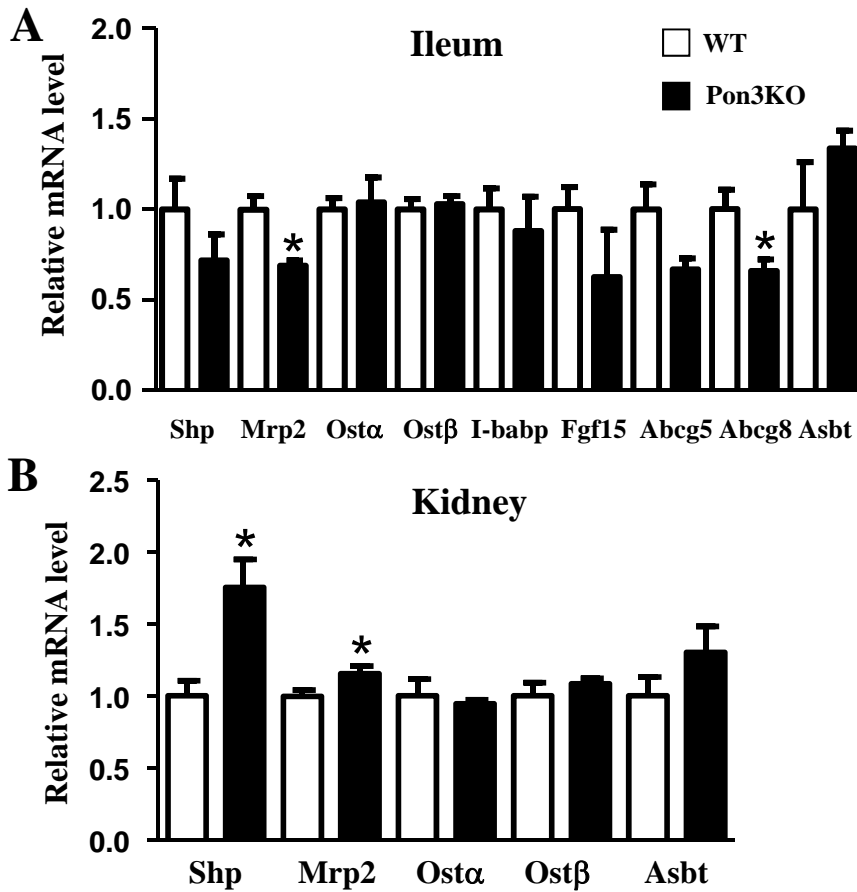

**Supplemental Figure S2. Altered gene expression in the ileum and kidney of Pon3KO mice.** Gene expression analysis of (A) ileum and (B) kidney mRNA samples isolated from the WT and Pon3KO mice fed the CC diet for 10 weeks. \*:  $p < 0.05$  between the two genotype groups.

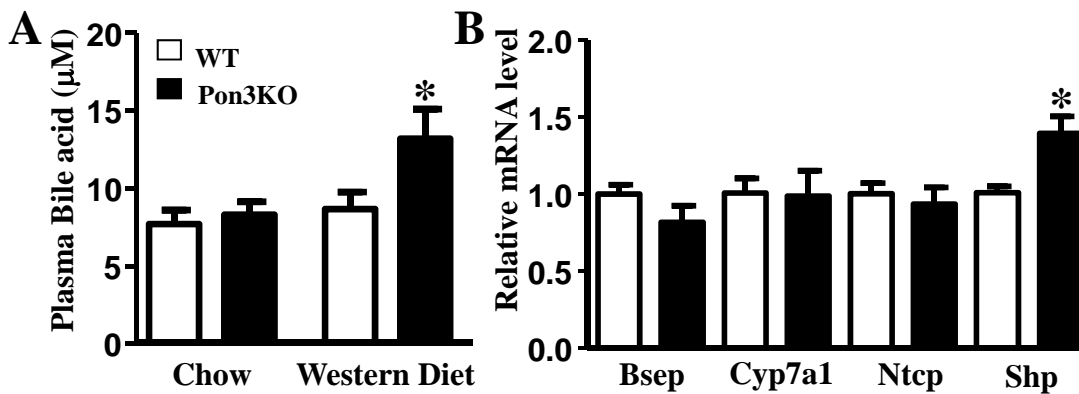

**Supplemental Figure S3. Plasma bile acid levels and liver gene expression of Pon3KO and WT mice on chow or Western diets.** (A) Plasma total bile acid levels of Pon3KO and WT mice on chow or Western diets were shown. (B) Liver gene expression of Pon3KO and WT mice on a Western diet for 10 weeks was shown. \*:  $p < 0.05$  between the two genotype groups.
